# Supplementary material for: ENSO – cave dripwater hydrochemical relationship: a 7-year dataset from SE Australia
Source: Copernicus journal article supplement (doi:10.5194/hess-2016-201), 2016-06-02

## Supplementary data

EA. 1. Description of instrumentation employed and data recorded including resolution, range and accuracy where available.

| Parameter                                              | Resolution | Range                                  | Accuracy ±                                                                                 |
|--------------------------------------------------------|------------|----------------------------------------|--------------------------------------------------------------------------------------------|
| <b>Davis Vantage Pro2™ Weather Station</b>             |            |                                        |                                                                                            |
| BAROMETRIC PRESSURE                                    |            |                                        |                                                                                            |
| Barometric Pressure (Elevation range: -600 to +4570 m) | 0.1 mb     | 540 to 1100 mb or hPa                  | 1,0 mb or hPa                                                                              |
| HUMIDITY                                               |            |                                        |                                                                                            |
| Inside humidity                                        | 1%         | 1% to 100%                             | 3%                                                                                         |
| Outside humidity                                       | 1%         | 1% to 100%                             | 3%                                                                                         |
| RAINFALL                                               |            |                                        |                                                                                            |
| Rainfall                                               | 0.2 mm     | 0 to 6553 mm                           | 4%                                                                                         |
| Rate of rainfall                                       | 0.1 mm/hr  | 0 to 2438 mm/hr                        | 5% ≤ 127 mm/hr                                                                             |
| TEMPERATURE                                            |            |                                        |                                                                                            |
| Inside temperature                                     | 0.1°C      | 0° to +60°C                            | 0.5°C                                                                                      |
| Outside temperature                                    | 0.1°C      | -40° to +65°C                          | 0.5°C                                                                                      |
| WIND                                                   |            |                                        |                                                                                            |
| Wind direction                                         | 1°         | 0° to 360°                             | 3°                                                                                         |
| Wind speed                                             | 1 km/hr    | 1 to 320 km/hr                         | 5%                                                                                         |
| <b>Stevens Hydra Probe® Soil Sensor</b>                |            |                                        |                                                                                            |
| Temperature                                            | -          | -10° to +55°C                          | 0.6°C                                                                                      |
| Soil moisture wfv                                      | -          | From completely dry to fully saturated | 0.01 (for most soils)<br>0.03 m <sup>3</sup> m <sup>-3</sup> (max for fine textured soils) |
| Electrical Conductivity                                | -          | 0.01 to 1.5 S/m                        | ± 2.0% or 0.005 S/m whichever is typically greater                                         |
| Dielectric constant                                    | -          | 1 to 80                                | ± 1.5% or 0.2 whichever is typically greater                                               |
| <b>Vaisala GMP343 Carbon dioxide probe</b>             |            |                                        |                                                                                            |
| Soil CO <sub>2</sub>                                   | -          | 0 – 2 %                                | 10 ppm CO <sub>2</sub>                                                                     |

EA. 2. Dripwater  $\ln(\text{Sr}/\text{Ca})$  vs.  $\ln(\text{Mg}/\text{Ca})$  ratios at site HW1 and HW3 are graphed together with the bedrock ratios.

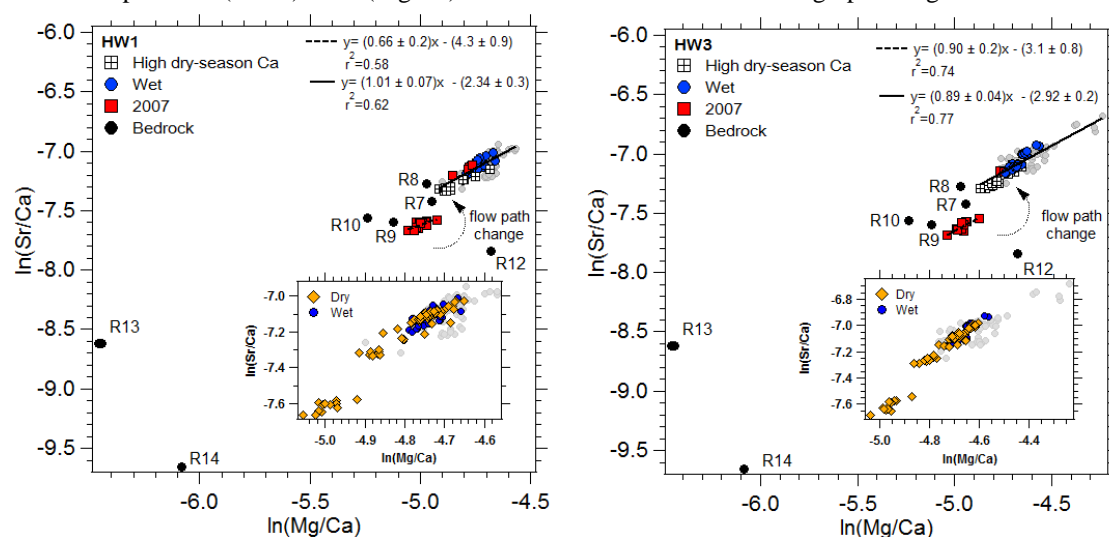

Supplement: Supplementary file 1 [file hess-2016-201-supplement.pdf]
